# Supplementary material
Source: Springer Nature journal article supplement (https://www.springerprofessional.de/resource/supplementary/13638_2012_720_MOESM2_ESM.pdf/11898274)

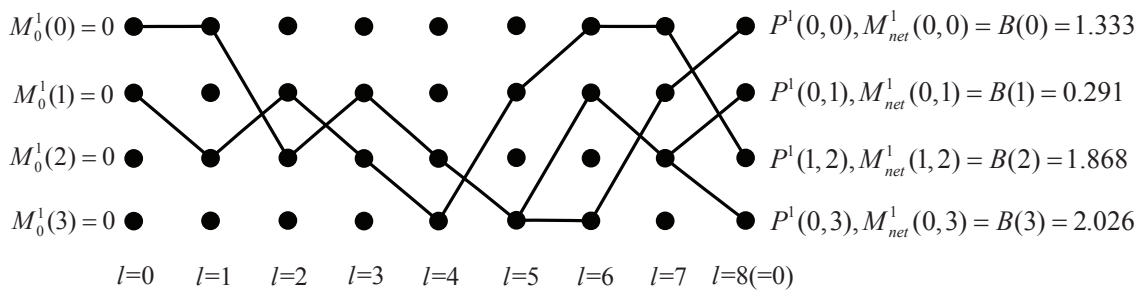

(a)

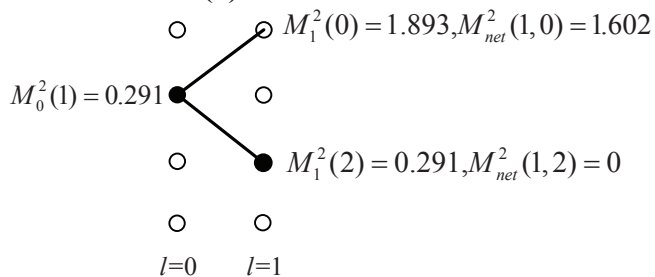

(b)

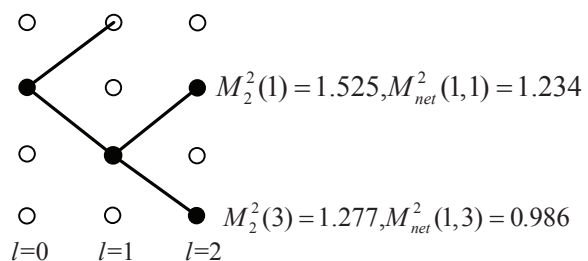

(c)

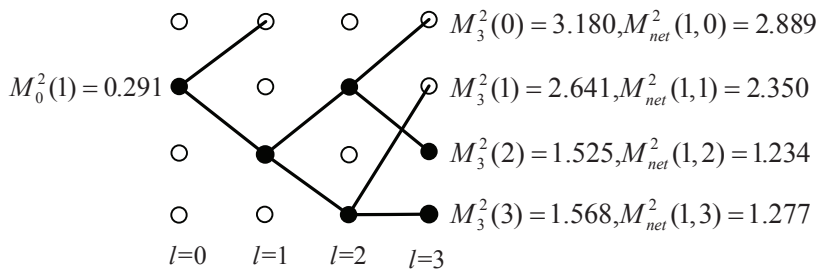

(d)

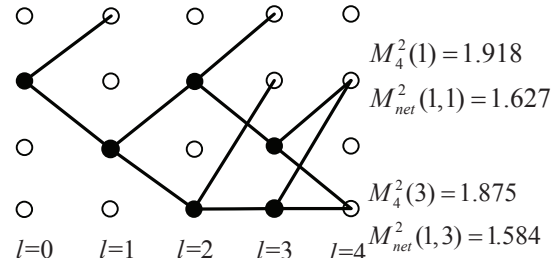

(e)

Supplement: MOESM2 [file 11898274]
